# Supplementary material
Source: publisher figshare collection journal article supplement (https://acs.figshare.com/ndownloader/files/5726904)
Supplement: Supplementary file 1 [file 5726904]

## Supporting Information for:

# Consistent Helicities from CD and Template t/c Data for N-Templated Polyalanines: Progress Toward Resolution of the Alanine Helicity Problem

Robert J. Kennedy, Kwok-Yin Tsang and Daniel S. Kemp\*

## I. Experimental

Peptides were synthesized, purified and identified as previously described.<sup>1</sup>

## II. Characterization Table

| Peptide                                                                                 | Electrospray Mass Spectrometry<br>(M+zH)/z Found (Expected)        |
|-----------------------------------------------------------------------------------------|--------------------------------------------------------------------|
| AcHel-A <sub>4</sub> - <sup>t</sup> LInp <sub>2</sub> K <sub>4</sub> W-NH <sub>2</sub>  | 539.77 (539.32); 405.06 (404.74)                                   |
| AcHel-A <sub>5</sub> - <sup>t</sup> LInp <sub>2</sub> K <sub>4</sub> W-NH <sub>2</sub>  | 842.78 (844.00); 562.45 (563.00)                                   |
| AcHel-A <sub>6</sub> - <sup>t</sup> LInp <sub>2</sub> K <sub>4</sub> W-NH <sub>2</sub>  | 879.80 (879.52); 586.59 (586.68)                                   |
| AcHel-A <sub>7</sub> - <sup>t</sup> LInp <sub>2</sub> K <sub>4</sub> W-NH <sub>2</sub>  | 915.14 (915.03); 610.20 (610.36); 457.91(458.02)                   |
| AcHel-A <sub>8</sub> - <sup>t</sup> LInp <sub>2</sub> K <sub>4</sub> W-NH <sub>2</sub>  | 950.83 (950.55); 634.58 (634.04); 476.01 (475.78)                  |
| AcHel-A <sub>9</sub> - <sup>t</sup> LInp <sub>2</sub> K <sub>4</sub> W-NH <sub>2</sub>  | 986.12 (986.07); 657.94 (657.72); 395.08 (395.03)                  |
| AcHel-A <sub>10</sub> - <sup>t</sup> LInp <sub>2</sub> K <sub>4</sub> W-NH <sub>2</sub> | 1021.55 (1021.59); 681.30 (681.40); 511.15 (511.30)                |
| AcHel-A <sub>11</sub> - <sup>t</sup> LInp <sub>2</sub> K <sub>4</sub> W-NH <sub>2</sub> | 1057.17 (1057.11); 705.76 (705.07); 528.76 (529.06)                |
| AcHel-A <sub>12</sub> - <sup>t</sup> LInp <sub>2</sub> K <sub>4</sub> W-NH <sub>2</sub> | 1093.02 (1092.63); 728.97 (728.75); 546.97 (546.82)                |
| AcHel-A <sub>13</sub> - <sup>t</sup> LInp <sub>2</sub> K <sub>4</sub> W-NH <sub>2</sub> | 1127.84 (1128.14); 752.31 (752.43); 564.41 (564.58)                |
| AcHel-A <sub>14</sub> - <sup>t</sup> LInp <sub>2</sub> K <sub>4</sub> W-NH <sub>2</sub> | 1163.29 (1163.66); 775.87 (776.11); 582.11 (582.34)                |
| (H)- <sup>t</sup> LInp <sub>2</sub> K <sub>4</sub> W-NH <sub>2</sub>                    | 1051.71(1051.71); 526.30 (526.36); 351.18(351.18); 263.58 (263.58) |
| Ac- <sup>β</sup> D-Hel-A <sub>8</sub> -β-NH <sub>2</sub>                                | 1067.29 (1067.49); 534.10 (534.25)                                 |
| Ac- <sup>β</sup> D-Hel-A <sub>8</sub> -β-InpK <sub>2</sub> W-NH <sub>2</sub>            | 840.70 (840.92); 540.81 (540.95)                                   |

β = beta amino alanine, <sup>β</sup>D= beta linked aspartate

<sup>1</sup> Maison, W.; Arce, E.; Renold, P.; Kennedy, R. J.; Kemp, D. S. *J. Am. Chem.Soc.* **2001**, 123, *in press*.

### III. Circular Dichorism and t/c Analysis

CD spectra were obtained on an Aviv 62DS spectrometer. Peptides were dissolved in water and concentration was determined by the UV absorbance of the tryptophan residue at 280 nm ( $\epsilon_{280} = 5560 \text{ cm}^{-1} \text{ M}^{-1}$ ).<sup>1</sup>

To isolate the  $[\theta]_{222}$  of the alanine helix, the molar ellipticity of (H)- $^t\text{LInp}_2\text{K}_4\text{-NH}_2$  was subtracted from the molar ellipticity of the Ac-Hel- $\text{A}_n$ - $^t\text{LInp}_2\text{K}_4\text{-NH}_2$  series. The resulting molar ellipticity was divided by the number of alanine residues, yielding per residue molar ellipticity. The nonhelical CD contribution at 222 nm of the Ac-Hel was removed, by subtracting the limiting ellipticity.<sup>2</sup>

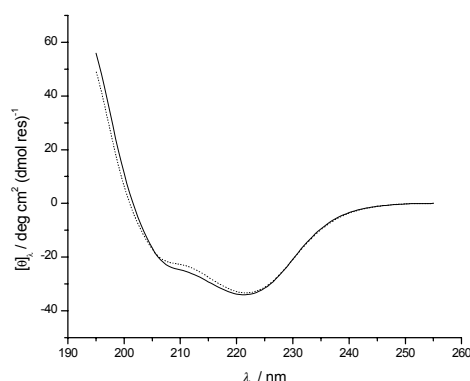

Plot of per residue molar ellipticity  $[\theta]_{222}$  for Ac-Hel- $\text{A}_{14}$ - $^t\text{LInp}_2\text{K}_4\text{-NH}_2$ . The original helical CD curve (dotted), - $^t\text{LInp}_2\text{K}_4\text{-NH}_2$  corrected CD curve (solid).

The measurement of the t/c values was preformed as previously described.<sup>3</sup> The t/c values for the series Ac-Hel- $\text{A}_n$ - $^t\text{LInp}_2\text{K}_4\text{W-NH}_2$  n= 5, 6, were consistent with AcHel- $\text{A}_n\text{-NH}_2$  as previously reported.<sup>3</sup>

### IV. Hydrogen Exchange

The decay of the amide NHs of Ac- $^{\beta}\text{D}$ -Hel- $\text{A}_8$ - $\beta\text{-NH}_2$  were monitored by 500 MHz NMR in 0.1M  $\text{NaH}_2\text{PO}_4$  at pH=4 as a function of time. The integration values were fit to a first order exponential decay. Both single and overlapping chemical shifts gave reasonable fits. When compared with the rate constants for Ac- $\text{A}_3$ -OH, the average protection factor for Ac- $^{\beta}\text{D}$ -Hel- $\text{A}_8$ - $\beta\text{-NH}_2$  was 17, which corresponds to an average fractional helicity of 0.94.

<sup>2</sup> Kemp, D. S.; Allen, T. J.; Oslick, S. L.; Boyd, J. G. *J. Am. Chem. Soc.* **1996**, *118*, 4240-4248.

<sup>3</sup> Renold, P.; Tsang, K-Y.; Shimizu, L. S.; Kemp, D. S. *J. Am. Chem. Soc.* **1996**, *118*, 12234-12235.

## V. Analytical Ultra Centrifugation

Ac-Hel-A<sub>9</sub>-<sup>t</sup>LInp<sub>2</sub>K<sub>4</sub>W-NH<sub>2</sub>, Ac-Hel-A<sub>14</sub>-<sup>t</sup>LInp<sub>2</sub>K<sub>4</sub>W-NH<sub>2</sub>, Ac-<sup>β</sup>D-Hel-A<sub>8</sub>-β-NH<sub>2</sub>, and Ac-<sup>β</sup>D-Hel-A<sub>8</sub>-βInpK<sub>2</sub>W-NH<sub>2</sub> were all found to be monomeric species by sedimentation equilibrium analysis at 40,000 and 45,000 rpm. Data was collected on a Beckman Optima XL-A centrifuge. Samples were tested at μM and mM concentration to take into account the solutions used in the CD and t/c – NMR experiments. Accurate molecular weights were obtained for μM samples in 0.1M NaCl. The consistent linear distribution of ln(c) vs. r<sup>2</sup>/2 for μM and mM peptide samples in water are indicative of monomeric species.

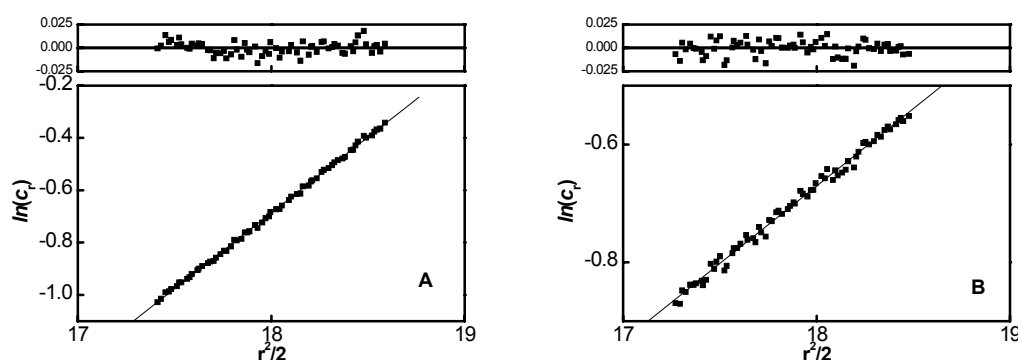

Sedimentation Equilibrium Analysis at 45,000 rpm for AcHel-A<sub>14</sub>-<sup>t</sup>LInp<sub>2</sub>K<sub>4</sub>W-NH<sub>2</sub>:  
**A** 20 μM peptide in 0.1M NaCl; **B** 5 mM peptide in D<sub>2</sub>O.
